# Supplementary material
Source: Springer Nature journal article supplement (https://www.springermedizin.de/resource/supplementary/12885_2012_3538_MOESM1_ESM.pdf/9463736)

Overall  
survival

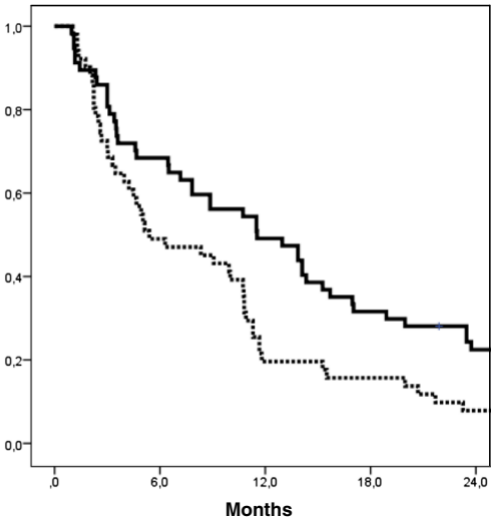

Months

Supplement: MOESM1 [file 9463736]
